# Supplementary material
Source: PubMed Central journal article supplement (PMC9536649)
Supplement: NIHMS1817996-supplement-321116_Major_Resources_Table.pdf [file NIHMS1817996-supplement-321116_Major_Resources_Table.pdf]

## Major Resources Table

### Antibodies

| Target antigen   | Vendor or Source | Catalog #   | Working concentration | Persistent ID / URL                                                                                                                                                                                                                 |
|------------------|------------------|-------------|-----------------------|-------------------------------------------------------------------------------------------------------------------------------------------------------------------------------------------------------------------------------------|
| CD8-APC-Cy7      | Biolegend        | #301015     | 1:200                 | <a href="https://www.biolegend.com/en-us/products/apc-cyanine7-anti-human-cd8a-antibody-832">https://www.biolegend.com/en-us/products/apc-cyanine7-anti-human-cd8a-antibody-832</a>                                                 |
| CD14-APC-Cy7     | Biolegend        | #301819     | 1:200                 | <a href="https://www.biolegend.com/en-us/products/apc-cyanine7-anti-human-cd14-antibody-3293">https://www.biolegend.com/en-us/products/apc-cyanine7-anti-human-cd14-antibody-3293</a>                                               |
| CD16-APC-Cy7     | Biolegend        | #302017     | 1:200                 | <a href="https://www.biolegend.com/en-us/products/apc-cyanine7-anti-human-cd16-antibody-1904">https://www.biolegend.com/en-us/products/apc-cyanine7-anti-human-cd16-antibody-1904</a>                                               |
| CD19-APC-Cy7     | Biolegend        | #302217     | 1:200                 | <a href="https://www.biolegend.com/en-us/products/apc-cyanine7-anti-human-cd19-antibody-1910?GroupID=BLG10095">https://www.biolegend.com/en-us/products/apc-cyanine7-anti-human-cd19-antibody-1910?GroupID=BLG10095</a>             |
| CD41-APC-Cy7     | Biolegend        | #303715     | 1:200                 | <a href="https://www.biolegend.com/en-us/search-results/apc-cyanine7-anti-human-cd41-antibody-7113">https://www.biolegend.com/en-us/search-results/apc-cyanine7-anti-human-cd41-antibody-7113</a>                                   |
| CD56-APC-Cy7     | Biolegend        | #318331     | 1:200                 | <a href="https://www.biolegend.com/en-us/search-results/apc-cyanine7-anti-human-cd56-ncam-antibody-7115">https://www.biolegend.com/en-us/search-results/apc-cyanine7-anti-human-cd56-ncam-antibody-7115</a>                         |
| CD3-PerCp-Cy5.5  | Biolegend        | #300429     | 1:200                 | <a href="https://www.biolegend.com/en-us/products/percp-cyanine5-5-anti-human-cd3-antibody-4214">https://www.biolegend.com/en-us/products/percp-cyanine5-5-anti-human-cd3-antibody-4214</a>                                         |
| CD4-Pacific Blue | Biolegend        | #300524     | 1:200                 | <a href="https://www.biolegend.com/en-us/search-results/pacific-blue-anti-human-cd4-antibody-2850?GroupID=BLG7755">https://www.biolegend.com/en-us/search-results/pacific-blue-anti-human-cd4-antibody-2850?GroupID=BLG7755</a>     |
| CD8-AF700        | Biolegend        | #301027     | 1:200                 | <a href="https://www.biolegend.com/en-us/products/alexa-fluor-700-anti-human-cd8a-antibody-3396">https://www.biolegend.com/en-us/products/alexa-fluor-700-anti-human-cd8a-antibody-3396</a>                                         |
| CD40L-PE         | Thermo Fisher    | #12-1548-42 | 1:100                 | <a href="https://www.thermofisher.com/antibody/product/CD154-CD40-Ligand-Antibody-clone-24-31-Monoclonal/12-1548-42">https://www.thermofisher.com/antibody/product/CD154-CD40-Ligand-Antibody-clone-24-31-Monoclonal/12-1548-42</a> |
| CD69-BV650       | Biolegend        | #310933     | 1:100                 | <a href="https://www.biolegend.com/en-us/products/brilliant-violet-650-anti-human-cd69-antibody-8345">https://www.biolegend.com/en-us/products/brilliant-violet-650-anti-human-cd69-antibody-8345</a>                               |

|                      |                |              |       |                                                                                                                                                                                                                                                                                                                                         |
|----------------------|----------------|--------------|-------|-----------------------------------------------------------------------------------------------------------------------------------------------------------------------------------------------------------------------------------------------------------------------------------------------------------------------------------------|
| CD25-Pe-Cy7          | Biolegend      | #302611      | 1:100 | <a href="https://www.biolegend.com/en-us/search-results/pe-cyanine7-anti-human-cd25-antibody-1909">https://www.biolegend.com/en-us/search-results/pe-cyanine7-anti-human-cd25-antibody-1909</a>                                                                                                                                         |
| OX-40-APC            | Biolegend      | #350007      | 1:100 | <a href="https://www.biolegend.com/en-us/search-results/apc-anti-human-cd134-ox40-antibody-7090">https://www.biolegend.com/en-us/search-results/apc-anti-human-cd134-ox40-antibody-7090</a>                                                                                                                                             |
| 4-1BB-BV605          | Biolegend      | #309821      | 1:100 | <a href="https://www.biolegend.com/en-us/products/brilliant-violet-605-anti-human-cd137-4-1bb-antibody-12103">https://www.biolegend.com/en-us/products/brilliant-violet-605-anti-human-cd137-4-1bb-antibody-12103</a>                                                                                                                   |
| CCR7-FITC            | Miltenyi       | #130-117-812 | 1:200 | <a href="https://www.miltenyibiotec.com/US-en/products/cd197-ccr7-antibody-anti-human-reafinity-rea108.html#fitc:30-tests-in-60-ul">https://www.miltenyibiotec.com/US-en/products/cd197-ccr7-antibody-anti-human-reafinity-rea108.html#fitc:30-tests-in-60-ul</a>                                                                       |
| CD45RA-AF700         | Biolegend      | #304119      | 1:200 | <a href="https://www.biolegend.com/en-us/products/alexa-fluor-700-anti-human-cd45ra-antibody-3421">https://www.biolegend.com/en-us/products/alexa-fluor-700-anti-human-cd45ra-antibody-3421</a>                                                                                                                                         |
| TNF-BV650            | Biolegend      | #502937      | 1:50  | <a href="https://www.biolegend.com/en-us/products/brilliant-violet-650-anti-human-tnf-alpha-antibody-7680">https://www.biolegend.com/en-us/products/brilliant-violet-650-anti-human-tnf-alpha-antibody-7680</a>                                                                                                                         |
| IFN $\gamma$ -Pe-Cy7 | Biolegend      | #502527      | 1:50  | <a href="https://www.biolegend.com/en-us/products/pe-cyanine7-anti-human-ifn-gamma-antibody-5939?GroupID=BLG10006">https://www.biolegend.com/en-us/products/pe-cyanine7-anti-human-ifn-gamma-antibody-5939?GroupID=BLG10006</a>                                                                                                         |
| IL-4-PE-Dazzle594    | Biolegend      | #500831      | 1:50  | <a href="https://www.biolegend.com/en-us/products/pe-dazzle-594-anti-human-il-4-antibody-10216">https://www.biolegend.com/en-us/products/pe-dazzle-594-anti-human-il-4-antibody-10216</a>                                                                                                                                               |
| IL-17A-APC           | eBioscience    | #17-7179-42  | 1:50  | <a href="https://www.thermofisher.com/antibody/product/IL-17A-Antibody-clone-eBio64DEC17-Monoclonal/17-7179-42">https://www.thermofisher.com/antibody/product/IL-17A-Antibody-clone-eBio64DEC17-Monoclonal/17-7179-42</a>                                                                                                               |
| IL-10-AF488          | Biolegend      | #501413      | 1:50  | <a href="https://www.biolegend.com/en-us/products/alexa-fluor-488-anti-human-il-10-antibody-2746?GroupID=GROUP24">https://www.biolegend.com/en-us/products/alexa-fluor-488-anti-human-il-10-antibody-2746?GroupID=GROUP24</a>                                                                                                           |
| CD40L-PE             | BD Biosciences | #555700      | 1:50  | <a href="https://www.bdbiosciences.com/en-us/products/reagents/flow-cytometry-reagents/research-reagents/single-color-antibodies-ruo/pe-mouse-anti-human-cd154.555700">https://www.bdbiosciences.com/en-us/products/reagents/flow-cytometry-reagents/research-reagents/single-color-antibodies-ruo/pe-mouse-anti-human-cd154.555700</a> |
| HLA-DR-BV785         | Biolegend      | #307641      | 1:200 | <a href="https://www.biolegend.com/en-us/products/brilliant-violet-785-anti-human-hla-dr-antibody-7975">https://www.biolegend.com/en-us/products/brilliant-violet-785-anti-human-hla-dr-antibody-7975</a>                                                                                                                               |

|                                                 |                   |            |               |                                                                                                                                                                                                                                                                                                                                                                 |
|-------------------------------------------------|-------------------|------------|---------------|-----------------------------------------------------------------------------------------------------------------------------------------------------------------------------------------------------------------------------------------------------------------------------------------------------------------------------------------------------------------|
| HLA-DP-PE                                       | BD Biosciences    | #566825    | 1:200         | <a href="https://wwwbdbiosciences.com/en-us/products/reagents/flow-cytometry-reagents/research-reagents/single-color-antibodies-ruo/pe-mouse-anti-human-hla-dp.566825">https://wwwbdbiosciences.com/en-us/products/reagents/flow-cytometry-reagents/research-reagents/single-color-antibodies-ruo/pe-mouse-anti-human-hla-dp.566825</a>                         |
| IFN $\gamma$ mAb, purified                      | Mabtech           | 3420-3-250 | 5 $\mu$ g/ml  | <a href="https://www.mabtech.com/products/anti-human-ifn-gamma-antibody-1-d1k-purified-3420-3">https://www.mabtech.com/products/anti-human-ifn-gamma-antibody-1-d1k-purified-3420-3</a>                                                                                                                                                                         |
| IFN $\gamma$ mAb, biotinylated                  | Mabtech           | 3420-6-250 | 1 $\mu$ g/ml  | <a href="https://www.mabtech.com/products/anti-human-ifn-gamma-antibody-7-b6-1-biotinylated-3420-6">https://www.mabtech.com/products/anti-human-ifn-gamma-antibody-7-b6-1-biotinylated-3420-6</a>                                                                                                                                                               |
| CD40/TNF RSF5                                   | Novus Biologicals | NBP2-52697 | 1 $\mu$ g/ml  | <a href="https://www.novusbio.com/products/cd40-tnfrsf5-antibody-g285_nbp2-52697">https://www.novusbio.com/products/cd40-tnfrsf5-antibody-g285_nbp2-52697</a>                                                                                                                                                                                                   |
| purified anti-human HLA-DR, DP, DQ (clone Tu39) | BD Biosciences    | 555557     | 20 $\mu$ g/ml | <a href="https://wwwbdbiosciences.com/en-us/products/reagents/flow-cytometry-reagents/research-reagents/single-color-antibodies-ruo/purified-mouse-anti-human-hla-dr-dp-dq.555557">https://wwwbdbiosciences.com/en-us/products/reagents/flow-cytometry-reagents/research-reagents/single-color-antibodies-ruo/purified-mouse-anti-human-hla-dr-dp-dq.555557</a> |
| Human TruStain FcX™                             | Biolegend         | 422302     | 1:75          | <a href="https://www.biolegend.com/en-us/products/human-trustain-fcx-fc-receptor-blocking-solution-6462">https://www.biolegend.com/en-us/products/human-trustain-fcx-fc-receptor-blocking-solution-6462</a>                                                                                                                                                     |

**Other (Peptide pools, cell culture reagents, assay kits, buffers and reagents)**

| Description                                 | Vendor                   | Catalog #  | Persistent ID / URL                                                                                                                                                               |
|---------------------------------------------|--------------------------|------------|-----------------------------------------------------------------------------------------------------------------------------------------------------------------------------------|
| CEFX Ultra SuperStim Pool MHC-II Subset     | JPT Peptide Technologies | PM-CEFX-3  | <a href="https://www.jpt.com/cefx-ultra-superstim-pool-mhc-ii-subset/PM-CEFX-3">https://www.jpt.com/cefx-ultra-superstim-pool-mhc-ii-subset/PM-CEFX-3</a>                         |
| PepMix™ Human (Actin)                       | JPT Peptide Technologies | PM-ACTS    | <a href="https://www.jpt.com/pepmix-human-actin/PM-ACTS">https://www.jpt.com/pepmix-human-actin/PM-ACTS</a>                                                                       |
| Phytohemagglutinin-L                        | eBioscience              | 00-4977-03 | <a href="https://www.thermofisher.com/order/catalog/product/00-4977-03">https://www.thermofisher.com/order/catalog/product/00-4977-03</a>                                         |
| ImmunoCult™ Human CD3/CD28 T Cell Activator | Stemcell                 | 10971      | <a href="https://www.stemcell.com/products/immunocult-human-cd3-cd28-t-cell-activator.html">https://www.stemcell.com/products/immunocult-human-cd3-cd28-t-cell-activator.html</a> |
| Dimethyl sulfoxide                          | Millipore Sigma          | D2650      | <a href="https://www.sigmaaldrich.com/US/en/product/sigma/d2650">https://www.sigmaaldrich.com/US/en/product/sigma/d2650</a>                                                       |

|                                           |                     |              |                                                                                                                                                                                                                                                                 |
|-------------------------------------------|---------------------|--------------|-----------------------------------------------------------------------------------------------------------------------------------------------------------------------------------------------------------------------------------------------------------------|
| Ficoll® Paque Plus                        | Millipore Sigma     | GE17-1440-03 | <a href="https://www.sigmaaldrich.com/US/en/product/sigma/ge17144003">https://www.sigmaaldrich.com/US/en/product/sigma/ge17144003</a>                                                                                                                           |
| CryoStor® CS10                            | Stemcell            | 07930        | <a href="https://www.stemcell.com/cryostor-cs10.html">https://www.stemcell.com/cryostor-cs10.html</a>                                                                                                                                                           |
| TexMACS™                                  | Miltenyi Biotec     | 130-097-196  | <a href="https://www.miltenyibiotec.com/US-en/products/texmacs-medium.html#gref">https://www.miltenyibiotec.com/US-en/products/texmacs-medium.html#gref</a>                                                                                                     |
| Protein Transport Inhibitor               | eBioscience         | 00-4980-03   | <a href="https://www.thermofisher.com/order/catalog/product/00-4980-03">https://www.thermofisher.com/order/catalog/product/00-4980-03</a>                                                                                                                       |
| Ghost Dye™ Violet 510                     | Tonbo               | 13-0870-T500 | <a href="https://tonbobio.com/products/ghost-dye-violet-510">https://tonbobio.com/products/ghost-dye-violet-510</a>                                                                                                                                             |
| IC Fixation Buffer                        | eBioscience         | 00-8222-49   | <a href="https://www.thermofisher.com/order/catalog/product/00-8222-49">https://www.thermofisher.com/order/catalog/product/00-8222-49</a>                                                                                                                       |
| Permeabilization Buffer (10X)             | eBioscience         | 00-8333-56   | <a href="https://www.thermofisher.com/order/catalog/product/00-8333-56">https://www.thermofisher.com/order/catalog/product/00-8333-56</a>                                                                                                                       |
| UltraComp eBeads™                         | Invitrogen          | 01-2222-42   | <a href="https://www.thermofisher.com/order/catalog/product/01-2222-42">https://www.thermofisher.com/order/catalog/product/01-2222-42</a>                                                                                                                       |
| Bovine Serum Albumin                      | Millipore Sigma     | A9647        | <a href="https://www.sigmaaldrich.com/US/en/product/sigma/a9647">https://www.sigmaaldrich.com/US/en/product/sigma/a9647</a>                                                                                                                                     |
| TWEEN® 20                                 | Millipore Sigma     | P1379        | <a href="https://www.sigmaaldrich.com/US/en/product/sigma/p1379">https://www.sigmaaldrich.com/US/en/product/sigma/p1379</a>                                                                                                                                     |
| N,N-Dimethylformamide                     | Millipore Sigma     | D4551        | <a href="https://www.sigmaaldrich.com/US/en/product/sigma/d4551">https://www.sigmaaldrich.com/US/en/product/sigma/d4551</a>                                                                                                                                     |
| 3-Amino-9-ethylcarbazole                  | Millipore Sigma     | A6926        | <a href="https://www.sigmaaldrich.com/US/en/product/sigma/a6926">https://www.sigmaaldrich.com/US/en/product/sigma/a6926</a>                                                                                                                                     |
| VECTASTAIN® Elite ABC-HRP Kit, Peroxidase | Vector laboratories | PK-6100      | <a href="https://vectorlabs.com/products/abc-kits/vectastain-elite-abc-hrp-kit-standard">https://vectorlabs.com/products/abc-kits/vectastain-elite-abc-hrp-kit-standard</a>                                                                                     |
| Hydrogen peroxide solution                | Millipore Sigma     | H1009        | <a href="https://www.sigmaaldrich.com/US/en/product/sigma/h1009">https://www.sigmaaldrich.com/US/en/product/sigma/h1009</a>                                                                                                                                     |
| CellTrace™ CFSE Cell Proliferation Kit    | Invitrogen          | C34554       | <a href="https://www.thermofisher.com/order/catalog/product/C34554">https://www.thermofisher.com/order/catalog/product/C34554</a>                                                                                                                               |
| Human Th1/Th2/Th17 cytokine kit           | BD Biosciences      | 560484       | <a href="https://wwwbdbiosciences.com/en-us/products/reagents/immunoassay-reagents/cba/cba-kits/human-th1-th2-th17-cba-kit.560484">https://wwwbdbiosciences.com/en-us/products/reagents/immunoassay-reagents/cba/cba-kits/human-th1-th2-th17-cba-kit.560484</a> |
